# Supplementary material
Source: PubMed Central journal article supplement (PMC4705439)
Supplement: NIHMS64711-supplement-01.pdf [file NIHMS64711-supplement-01.pdf]

**Supplementary Figure 1. Confirmation of antibody specificity by immunofluorescence and Western blotting**

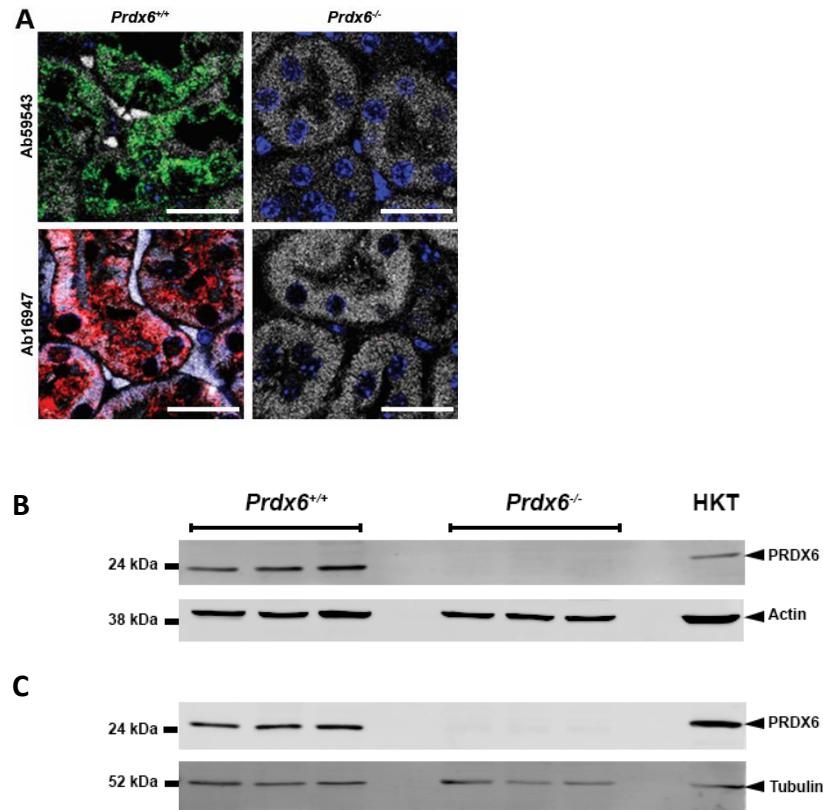

Kidney sections from *Prdx6*<sup>+/+</sup> and *Prdx6*<sup>-/-</sup> mice were used to test the specificity of the anti PRDX6 antibodies Ab59543 (green) and Ab16947 (red) (A) Scale bars: 20  $\mu$ m. Western blots with three samples each of *Prdx6*<sup>+/+</sup> and *Prdx6*<sup>-/-</sup> total kidney lysate with a human kidney total (HKT) lysate as a control were probed with Ab59543 (B) and Ab16947 (C). Actin and tubulin were used as loading controls respectively. The sample preparations were carried out under reducing conditions.

**Supplementary Figure 2. Summarized MALDI-TOF-TOF results of the expressed construct PRDX6 monomer and dimer doublet bands and their oxidation states.**

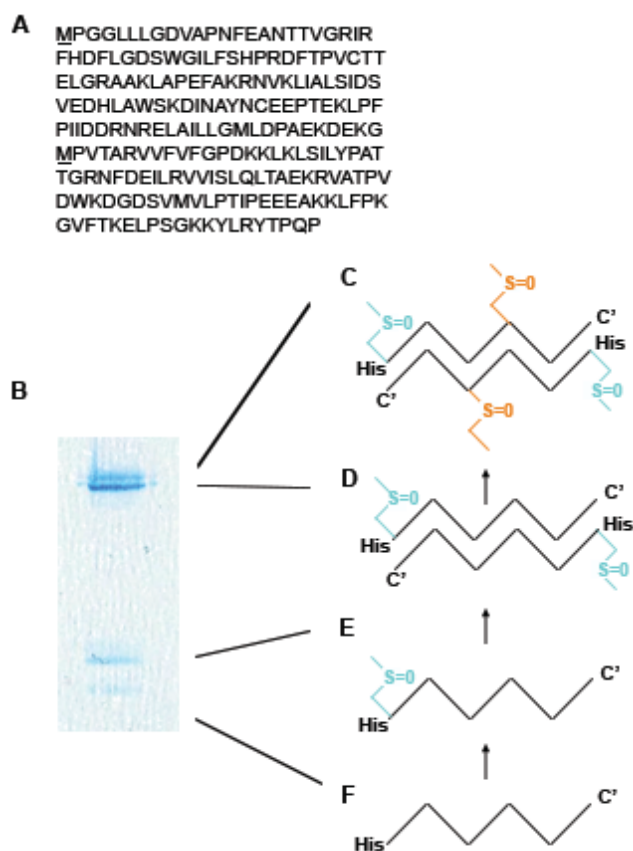

(A) Amino acid sequence of PRDX6 (A) with oxidised methionine residues (M1 and M127) identified by Mascot software underlined. (B) Coomassie-stained gel of expressed purified HisPRDX6 showing the protein in a range of oxidation states and (C-F) schematics showing the different oxidation states of HisPRDX6 as indicated by Mascot data. The native HisPRDX6 oxidation state corresponds to the lowest band separated on a gel (F) with (E) thru (C) representing each ascending excised band of HisPRDX6 and the corresponding oxidation of methionines and the dimerization of the protein.

**Supplementary Figure 3. MBP-AE1(C) and MBP protein expression.**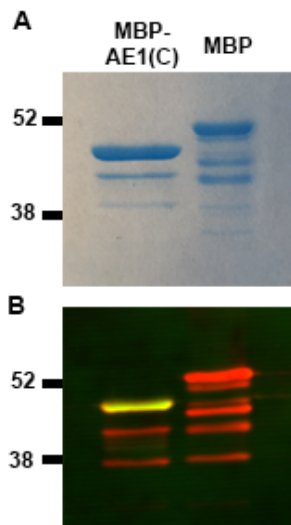

(A) Coomassie-stained gel of expressed and purified MBP-AE1(C) and MBP. (B) Merged Western blot image of the samples probed simultaneously for AE1 (green) and MBP (red) using a fluorescent conjugated secondary dye. Yellow staining represents overlapping signals.

## Supplementary Figure 4. Vacuole characterization and detection of apoptosis

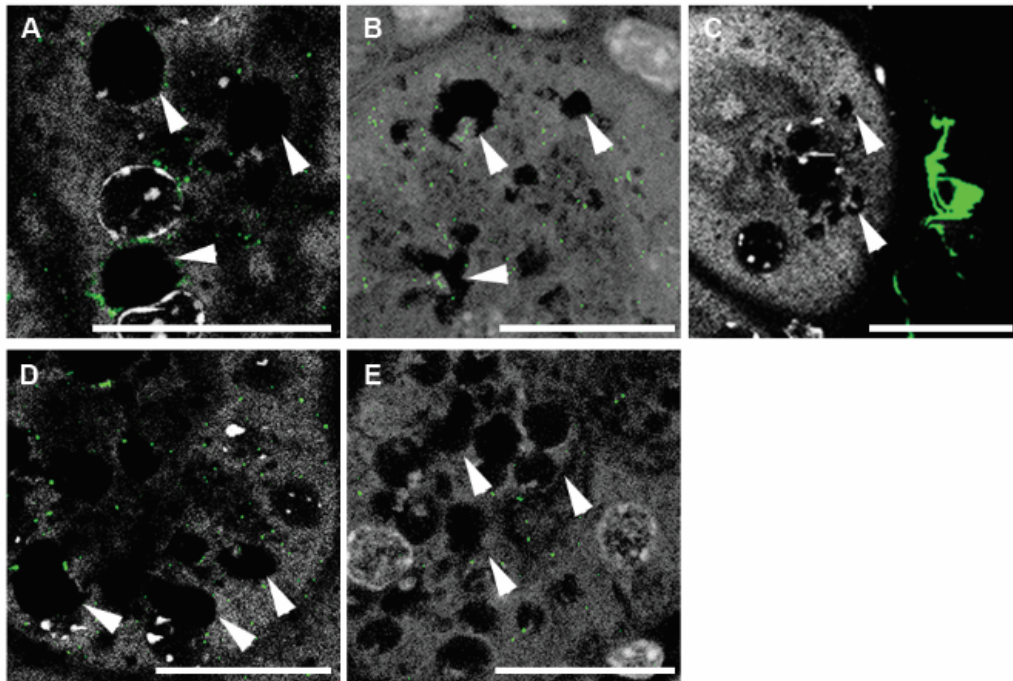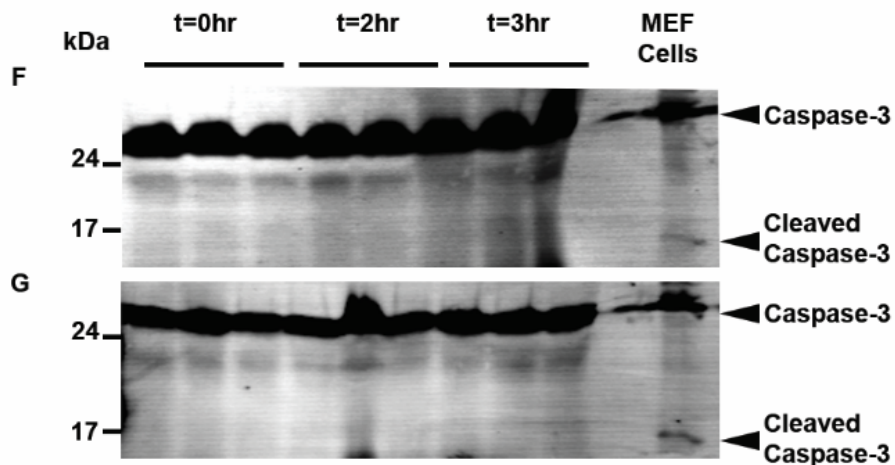

Kidney sections from acid gavaged *Prdx6*<sup>+/+</sup> mice showing vacuolation (white arrowheads) were stained for (A) calreticulin, a soluble endoplasmic reticulum protein; (B) LC3, an autophagosomal marker; (C) perilipin, a lipid storage protein; (D) EEA1, an early endosomal marker; and (E) LAMP2, a lysosomal marker. All staining in green, scale bars = 20  $\mu$ m.

A Western blot for activated Caspase-3 (17/19 kDa cleaved fragment) was performed on *Prdx6*<sup>+/+</sup> (F) and *Prdx6*<sup>-/-</sup> (G) mouse kidney lysates after acid gavage showed no detectable activation (n=3 for each group). Staurosporine-treated mouse embryonic fibroblasts (MEF) cells provided a control for the blot.

**Supplementary Table 1. Blood biochemistry of adult *Prdx6*<sup>+/+</sup> and *Prdx6*<sup>-/-</sup> animals**

|                                    | <i>Prdx6</i> <sup>+/+</sup> | <i>Prdx6</i> <sup>-/-</sup> | P      |
|------------------------------------|-----------------------------|-----------------------------|--------|
| pH                                 | 7.31 ± 0.03                 | 7.07 ± 0.04                 | 0.0080 |
| HCO <sub>3</sub> <sup>-</sup> (mM) | 20.3 ± 0.29                 | 18.8 ± 1.48                 | ns     |
| pCO <sub>2</sub> (kPa)             | 5.5 ± 0.38                  | 8.7 ± 0.11                  | 0.0012 |

Physiological blood parameters of adult *Prdx6*<sup>+/+</sup> and *Prdx6*<sup>-/-</sup> animals on a standard diet.

All values are mean ± SEM. n=3 animals.
